# Supplementary material
Source: publisher site journal article supplement (https://www.dovepress.com/article/313790)
Supplement: Supplementary file 1 [file get_supplementary_file.php]

**Supplementary material of Association of single nucleotide polymorphism  
rs2228570 with lumbar disc degeneration: A case-control study and  
meta-analysis**

Hengshuo Zhang, Lu Chen, Ziyu Wang, Fuan Wang, Yu Shan, Linzeng Qi and  
Yunzhen Chen

Table S1. Results of quality assessment using the Newcastle-Ottawa Scale for  
case-control studies

Table S2. Characteristics of case and control group

Table S3. Rs2228570, rs731236, rs7975232 and rs1544410's Hardy-Weinberg  
equilibrium test

Table S4. Characteristics of case group

Table S1. Results of quality assessment using the Newcastle-Ottawa Scale for case-control studies

| First author | Selection                          |                                         |                          |                           | Comparability<br>Control for<br>important<br>factor <sup>a</sup> | Exposure                     |                                                       |                          | Scores |
|--------------|------------------------------------|-----------------------------------------|--------------------------|---------------------------|------------------------------------------------------------------|------------------------------|-------------------------------------------------------|--------------------------|--------|
|              | Adequate<br>definition<br>of cases | Representati-<br>veness of the<br>cases | Selection of<br>controls | Definition<br>of controls |                                                                  | Ascertainment<br>of exposure | Same method of<br>ascertainment<br>cases and controls | Non-response<br>for rate |        |
| Cauci        | ★                                  | ★                                       | ★                        | ★                         | ★ ★                                                              | ★                            | ★                                                     | ★                        | 9      |
| Serrano      | ★                                  | ★                                       |                          | ★                         | ★ ★                                                              | ★                            | ★                                                     | ★                        | 8      |
| Colombini    | ★                                  | ★                                       |                          | ★                         | ★ ★                                                              | ★                            | ★                                                     | ★                        | 8      |
| Kawaguchi    | ★                                  | ★                                       | ★                        |                           |                                                                  | ★                            | ★                                                     | ★                        | 6      |
| Kelempisioti | ★                                  | ★                                       | ★                        | ★                         | ★ ★                                                              | ★                            | ★                                                     | ★                        | 9      |
| Kitis        | ★                                  | ★                                       |                          | ★                         | ★                                                                | ★                            | ★                                                     | ★                        | 7      |
| Mashayekhi   | ★                                  | ★                                       | ★                        | ★                         | ★ ★                                                              | ★                            | ★                                                     | ★                        | 9      |
| Oishi        | ★                                  | ★                                       |                          | ★                         | ★ ★                                                              | ★                            | ★                                                     | ★                        | 8      |
| Ozdogan      | ★                                  | ★                                       |                          | ★                         | ★ ★                                                              | ★                            | ★                                                     | ★                        | 8      |
| Vieira       | ★                                  | ★                                       |                          | ★                         | ★                                                                | ★                            | ★                                                     | ★                        | 7      |
| Yuan         | ★                                  | ★                                       | ★                        | ★                         |                                                                  | ★                            | ★                                                     | ★                        | 7      |
| Vieira       | ★                                  | ★                                       |                          |                           |                                                                  | ★                            | ★                                                     | ★                        | 5      |
| Xu           | ★                                  | ★                                       | ★                        | ★                         | ★ ★                                                              | ★                            | ★                                                     | ★                        | 9      |
| Zawilla      | ★                                  | ★                                       | ★                        | ★                         | ★ ★                                                              | ★                            | ★                                                     | ★                        | 9      |
| Chen         | ★                                  | ★                                       |                          | ★                         | ★                                                                | ★                            | ★                                                     | ★                        | 7      |
| Cheung       | ★                                  | ★                                       | ★                        | ★                         | ★ ★                                                              | ★                            | ★                                                     | ★                        | 9      |
| Withanage    | ★                                  | ★                                       |                          | ★                         | ★                                                                | ★                            | ★                                                     | ★                        | 7      |

<sup>a</sup> A maximum of two stars can be allotted in this category, one for age and the other for other controlled factors.

Table S2. Characteristics of case and control group

| Characteristic          | Control     | Case        | P value |
|-------------------------|-------------|-------------|---------|
| Gender(Male/Female)     | 22/23       | 22/24       | 1       |
| Age(years)              | 52.76±13.73 | 50.13±14.24 | 0.37    |
| Height(m)               | 1.68±0.095  | 1.66±0.085  | 0.36    |
| Weight(kg)              | 70.24±12.49 | 70.96±13.17 | 0.79    |
| BMI(kg/m <sup>2</sup> ) | 24.88±3.56  | 25.63±3.77  | 0.34    |

BMI, body mass index

Table S3. Rs2228570, rs731236, rs7975232 and rs1544410's Hardy-Weinberg equilibrium test

| polymorphism | Control group (n) <sup>b</sup> |    |    | Case group (n) <sup>b</sup> |    |    | P value |
|--------------|--------------------------------|----|----|-----------------------------|----|----|---------|
|              | 11                             | 12 | 22 | 11                          | 12 | 22 |         |
| Rs2228570    | 6                              | 22 | 17 | 13                          | 24 | 9  | 0.79    |
| Rs731236     | 39                             | 6  | 0  | 44                          | 2  | 0  | 0.63    |
| Rs7975232    | 31                             | 14 | 0  | 32                          | 13 | 1  | 0.22    |
| Rs1544410    | 41                             | 4  | 0  | 45                          | 1  | 0  | 0.76    |

<sup>b</sup> 11 presents common homozygote, 12 presents heterozygote, 22 presents rare homozygote, 1 presents common allele, 2 presents rare allele

Table S4. Characteristics of case group

| Characteristic          | VAS<4         | VAS≥4         | P value |
|-------------------------|---------------|---------------|---------|
| Gender(Male/Female)     | 8/11          | 14/13         | 0.51    |
| Age(years)              | 50.37 ± 14.56 | 49.96 ± 14.29 | 0.93    |
| Height(m)               | 1.64 ± 0.08   | 1.67 ± 0.09   | 0.28    |
| Weight(kg)              | 69.97 ± 11.55 | 71.65 ± 14.37 | 0.68    |
| BMI(kg/m <sup>2</sup> ) | 25.90 ± 4.27  | 25.43 ± 3.45  | 0.68    |
| SCOR                    | 0.32 ± 0.09   | 0.37 ± 0.13   | 0.20    |
| DSCR                    | 0.23 ± 0.08   | 0.22 ± 0.09   | 0.68    |

VAS, Visual Analogue Scale; BMI, body mass index; SCOR, spinal canal occupation ratio( $SCOR=(b1-b2)/b1 \times 100\%$ , b1 is the anteroposterior diameter of the spinal canal, b2 is the shortest diameter of spinal canal); DSCR, decrease of spinal canal ratio( $DSCR=b1/b4-b2/b3$ , b1 is the anteroposterior diameter of the spinal canal, b2 is the shortest diameter of spinal canal, b3 is the anteroposterior diameter of intervertebral disc, b4 is the anteroposterior diameter of vertebral body)
